# Supplementary material
Source: publisher figshare collection journal article supplement (https://acs.figshare.com/ndownloader/files/3917857)
Supplement: Supplementary file 1 [file 3917857]

# On the Role of Ni-based Co-catalyst in Inhomogeneous $RVO_4$ Photocatalyst Systems (R=Y, Gd)

*Mitsutake Oshikiri<sup>a\*</sup>, Jinhua Ye<sup>b</sup>, and Mauro Boero<sup>c</sup>*

<sup>a</sup> Environment and Energy Materials Division, National Institute for Materials Science (NIMS),  
3-13 Sakura, Tsukuba, Ibaraki 305-0003, Japan

<sup>b</sup> Environment and Energy Materials Division, National Institute for Materials Science (NIMS),  
1-1 Namiki, Tsukuba, Ibaraki 305-0044, Japan

<sup>c</sup> Institut de Physique et Chimie des Matériaux de Strasbourg (IPCMS), CNRS-University of  
Strasbourg, UMR 7504, 23 rue du Loess, BP 43, F-67034 Strasbourg, France

SUPPORTING INFORMATION

**Table S1.** Main geometrical parameters of the simulated Ni-doped system.

| Bond                           | Bond length (Å)                |       |                                |       |                                |       |       |       |       | Av. (Å) | Av. (left column) /Av. bond length of Ni-O inside Ni doped bulk YVO <sub>4</sub> (%) | Remark |
|--------------------------------|--------------------------------|-------|--------------------------------|-------|--------------------------------|-------|-------|-------|-------|---------|--------------------------------------------------------------------------------------|--------|
|                                |                                |       |                                |       |                                |       |       |       |       |         |                                                                                      |        |
| Ni1-O<br>(Y-O)                 | 2.155                          | 2.335 | 2.352                          | 2.355 | 2.401<br>(O108 <sub>wt</sub> ) | 2.451 | 2.454 | 2.574 | 2.384 | +1.7    | (a)<br>init                                                                          |        |
| Ni2-O<br>(Y-O)                 | 2.191                          | 2.222 | 2.261                          | 2.337 | 2.391<br>(O130 <sub>wt</sub> ) | 2.538 | 2.557 | 2.687 | 2.398 | +2.3    |                                                                                      |        |
| Ni1-O                          | 1.963                          | 1.973 | 2.079                          | 2.265 | 2.614<br>(O108 <sub>wt</sub> ) | 2.691 | 3.060 | 3.458 | 2.515 | +7.3    | (b)<br>4.03ps                                                                        |        |
| Ni2-O                          | 1.990                          | 2.000 | 2.126<br>(O130 <sub>wt</sub> ) | 2.199 | 2.319                          | 2.715 | 3.183 | 3.199 | 2.466 | +5.2    |                                                                                      |        |
| Ni1-O<br>(O108 <sub>wt</sub> ) | 1.887<br>(O108 <sub>wt</sub> ) | 2.048 | 2.083                          | 2.162 | 2.231                          | 2.569 | 2.792 | 3.578 | 2.419 | +3.2    | (c)<br>4.13ps                                                                        |        |
| Ni2-O<br>(O130 <sub>wt</sub> ) | 2.010<br>(O130 <sub>wt</sub> ) | 2.140 | 2.202                          | 2.300 | 2.381                          | 3.061 | 3.145 | 3.261 | 2.563 | +9.3    |                                                                                      |        |
| Ni1-O                          | 2.031                          | 2.047 | 2.067<br>(O97 <sub>wt</sub> )  | 2.089 | 2.122                          | 2.431 | 3.258 | 3.396 | 2.430 | +3.7    | (d)<br>1 wt<br>gpt                                                                   |        |
| Ni1-O                          | 2.100                          | 2.155 | 2.206                          | 2.214 | 2.259                          | 2.356 | 2.365 | 3.090 | 2.343 | -       | (e)<br>Inside<br>bulk                                                                |        |
| Ni2-O                          | 2.135                          | 2.224 | 2.241                          | 2.245 | 2.250                          | 2.284 | 2.294 | 3.083 | 2.345 | -       |                                                                                      |        |

(a) Initial stage. (just after exchanging two Y with two Ni after having optimized cell thickness) Then the initial Ni-O distance is same as Y-O distance. Atomic index: Ni 1-2, Y 3-16, V 17-32, O<sub>cat</sub> 33-96, O<sub>wt</sub> 97-131, H 132-201 for (a)-(c). (b) Point C [4.03 ps] in Figure 1 (b). (c) Point D [4.13 ps] in Figure 1 (b). (d) Relaxed Ni1-O distance by geometry optimization (gpt) after removing all but one water molecule close to the surface of Y<sub>14</sub>Ni<sub>2</sub>V<sub>16</sub>O<sub>64</sub>+35wt. Atomic index: Ni 1-2, Y 3-16, V 17-32, O<sub>cat</sub> 33-96, O<sub>wt</sub> 97, H 98-99 for (d). (e) Doped inside the bulk (not on the surface). Atomic index: Ni 1-2, Y 3-16, V 17-32, O<sub>cat</sub> 33-96 for (e).

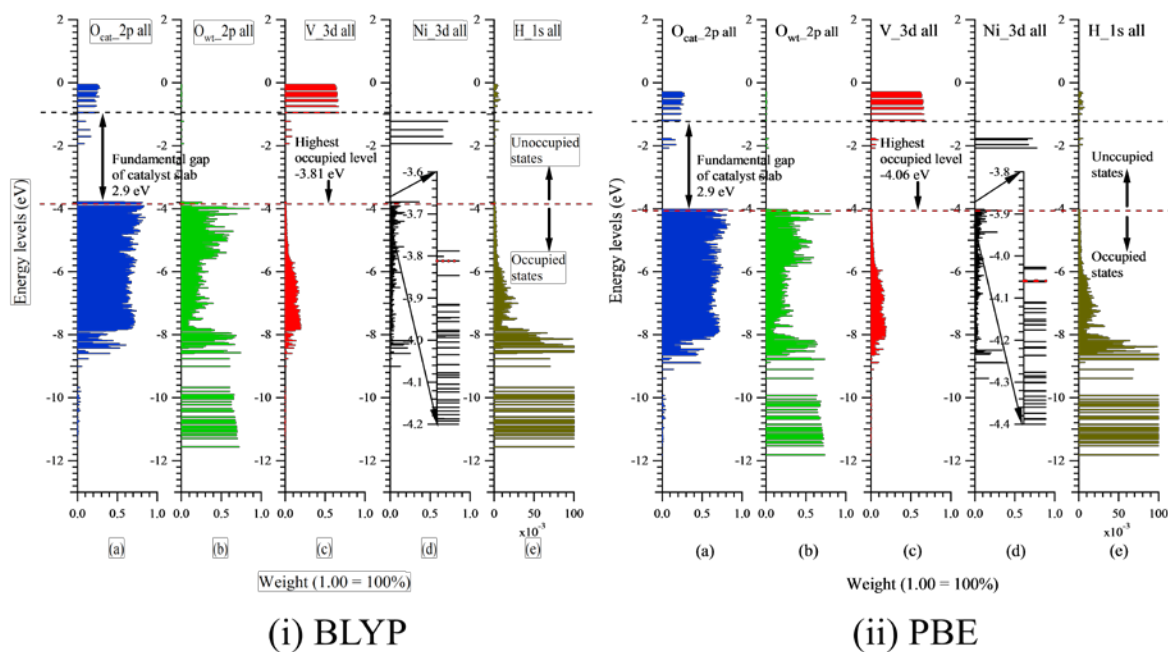

**Figure S2.** Electronic structure comparison of the Ni doped  $\text{YVO}_4$  in contact with water between the BLYP (i) and the PBE (ii) functionals.<sup>1</sup> The various profiles indicate the weights associated with the most relevant atoms, obtained as projections of each eigenfunction of the Kohn-Sham Hamiltonian onto atomic orbitals. Both panels refer to the point C of Figure 1 (b), where the distance between the O atom of adsorbed water molecule and the exposed Ni is relatively large ( $\text{O}_{108} - \text{Ni}_1 = \sim 2.61 \text{ \AA}$ ). This result confirms that both functionals have similar performances and give almost identical results, within the allowed numerical accuracy, in terms of electronic structure. This is in full agreement with the results reported in *ChemistryOpen* **2013**, 2, 115-124 showing that PBE and BLYP are comparable.<sup>1</sup> Moreover, whenever water is involved, the performance of BLYP is preferable, as discussed in *J. Chem. Phys.* **1996**, 105, 1142-1152.<sup>2</sup>

## REFERENCES

- (1) Steinmetz, M.; Grimme, S. Benchmark Study of the Performance of Density Functional Theory for Bond Activations with (Ni, Pd)-Based Transition-Metal Catalysts. *ChemistryOpen* **2013**, *2*, 115–124.
- (2) Sprik, M.; Hutter, J.; Parrinello, M. Ab initio Molecular Dynamics Simulation of Liquid Water: Comparison of Three Gradient-Corrected Density Functionals. *J. Chem. Phys.* **1996**, *105*, 1142-1152.
